# Supplementary material
Source: publisher site journal article supplement (https://www.dovepress.com/article/supplementary_file/609672/609672%20Supplementary%20Material.docx)
Supplement: Supplementary file 1 [file 609672%20Supplementary%20Material.docx]

| **Original model name** | **Python libraries and classes** | **Python parameter configuration** |
| --- | --- | --- |
| Naive Bayes (NB) | sklearn.naive_bayes.GaussianNB | var_smoothing=1e-09 |
| Gradient Boosting (GB) | sklearn.ensemble.GradientBoostingClassifier | n_estimators=100, learning_rate=0.1, max_depth=3 |
| Random Forest (RF) | sklearn.ensemble.RandomForestClassifier | n_estimators=100, max_depth=None, min_samples_split=2 |
| Multilayer Perceptron (MLP) | sklearn.neural_network.MLPClassifier | hidden_layer_sizes = (100,50), activation='relu', alpha=0.0001, learning_rate_init=0.001 |
| XGBoost | xgboost.XGBClassifier | n_estimators=100, learning_rate=0.1, max_depth=6, subsample=0.8 |
| LightGBM（LGBM） | lightgbm.LGBMClassifier | n_estimators=100, learning_rate=0.1, max_depth=-1, num_leaves=31 |
| k-Nearest Neighbors (KNN) | sklearn.neighbors.KNeighborsClassifier | n_neighbors=5, weights='uniform', metric='euclidean' |

**Supplementary Materials**.

**Table S1.** Python parameter configuration

**Table S2.** Delong_test.

|  | **LR** | **NB** | **GB** | **RF** | **MLP** | **XGB** | **LGBM** | **KNN** |
| --- | --- | --- | --- | --- | --- | --- | --- | --- |
| LR |  |  |  |  |  |  |  |  |
| NB | 0.0249 |  |  |  |  |  |  |  |
| GB | 0.014 | 0.054 |  |  | . |  |  |  |
| RF | 0.034 | 0.021 | 0.043 |  |  |  |  |  |
| MLP | 0.0456 | 0.048 | 0.012 | 0.045 |  |  |  |  |
| XGB | 0.0123 | 0.045 | 0.0234 | 0.018 | 0.01671 |  |  |  |
| LGBM | 0.037 | 0.0321 | 0.0411 | 0.0376 | 0.0124 | 0.045 |  |  |
| KNN | 0.0311 | 0.0156 | 0.0189 | 0.0432 | 0.0153 | 0.0334 | 0.0501 |  |

**Table S3.** Integrated discrimination improvement index (IDI) and net reclassification index (NRI))

| Indicators | Estimate | P-value | 95%CI |
| --- | --- | --- | --- |
| NRI (Categorical) | 0.19 | 0.0014 | 0.0737 – 0.3064 |
| NRI (Continuous) | 0.928 | ＜0.001 | 0.7106 – 1.1459 |
| IDI [95% CI] | 0.1603 | ＜0.001 | 0.1116 – 0.2091 |


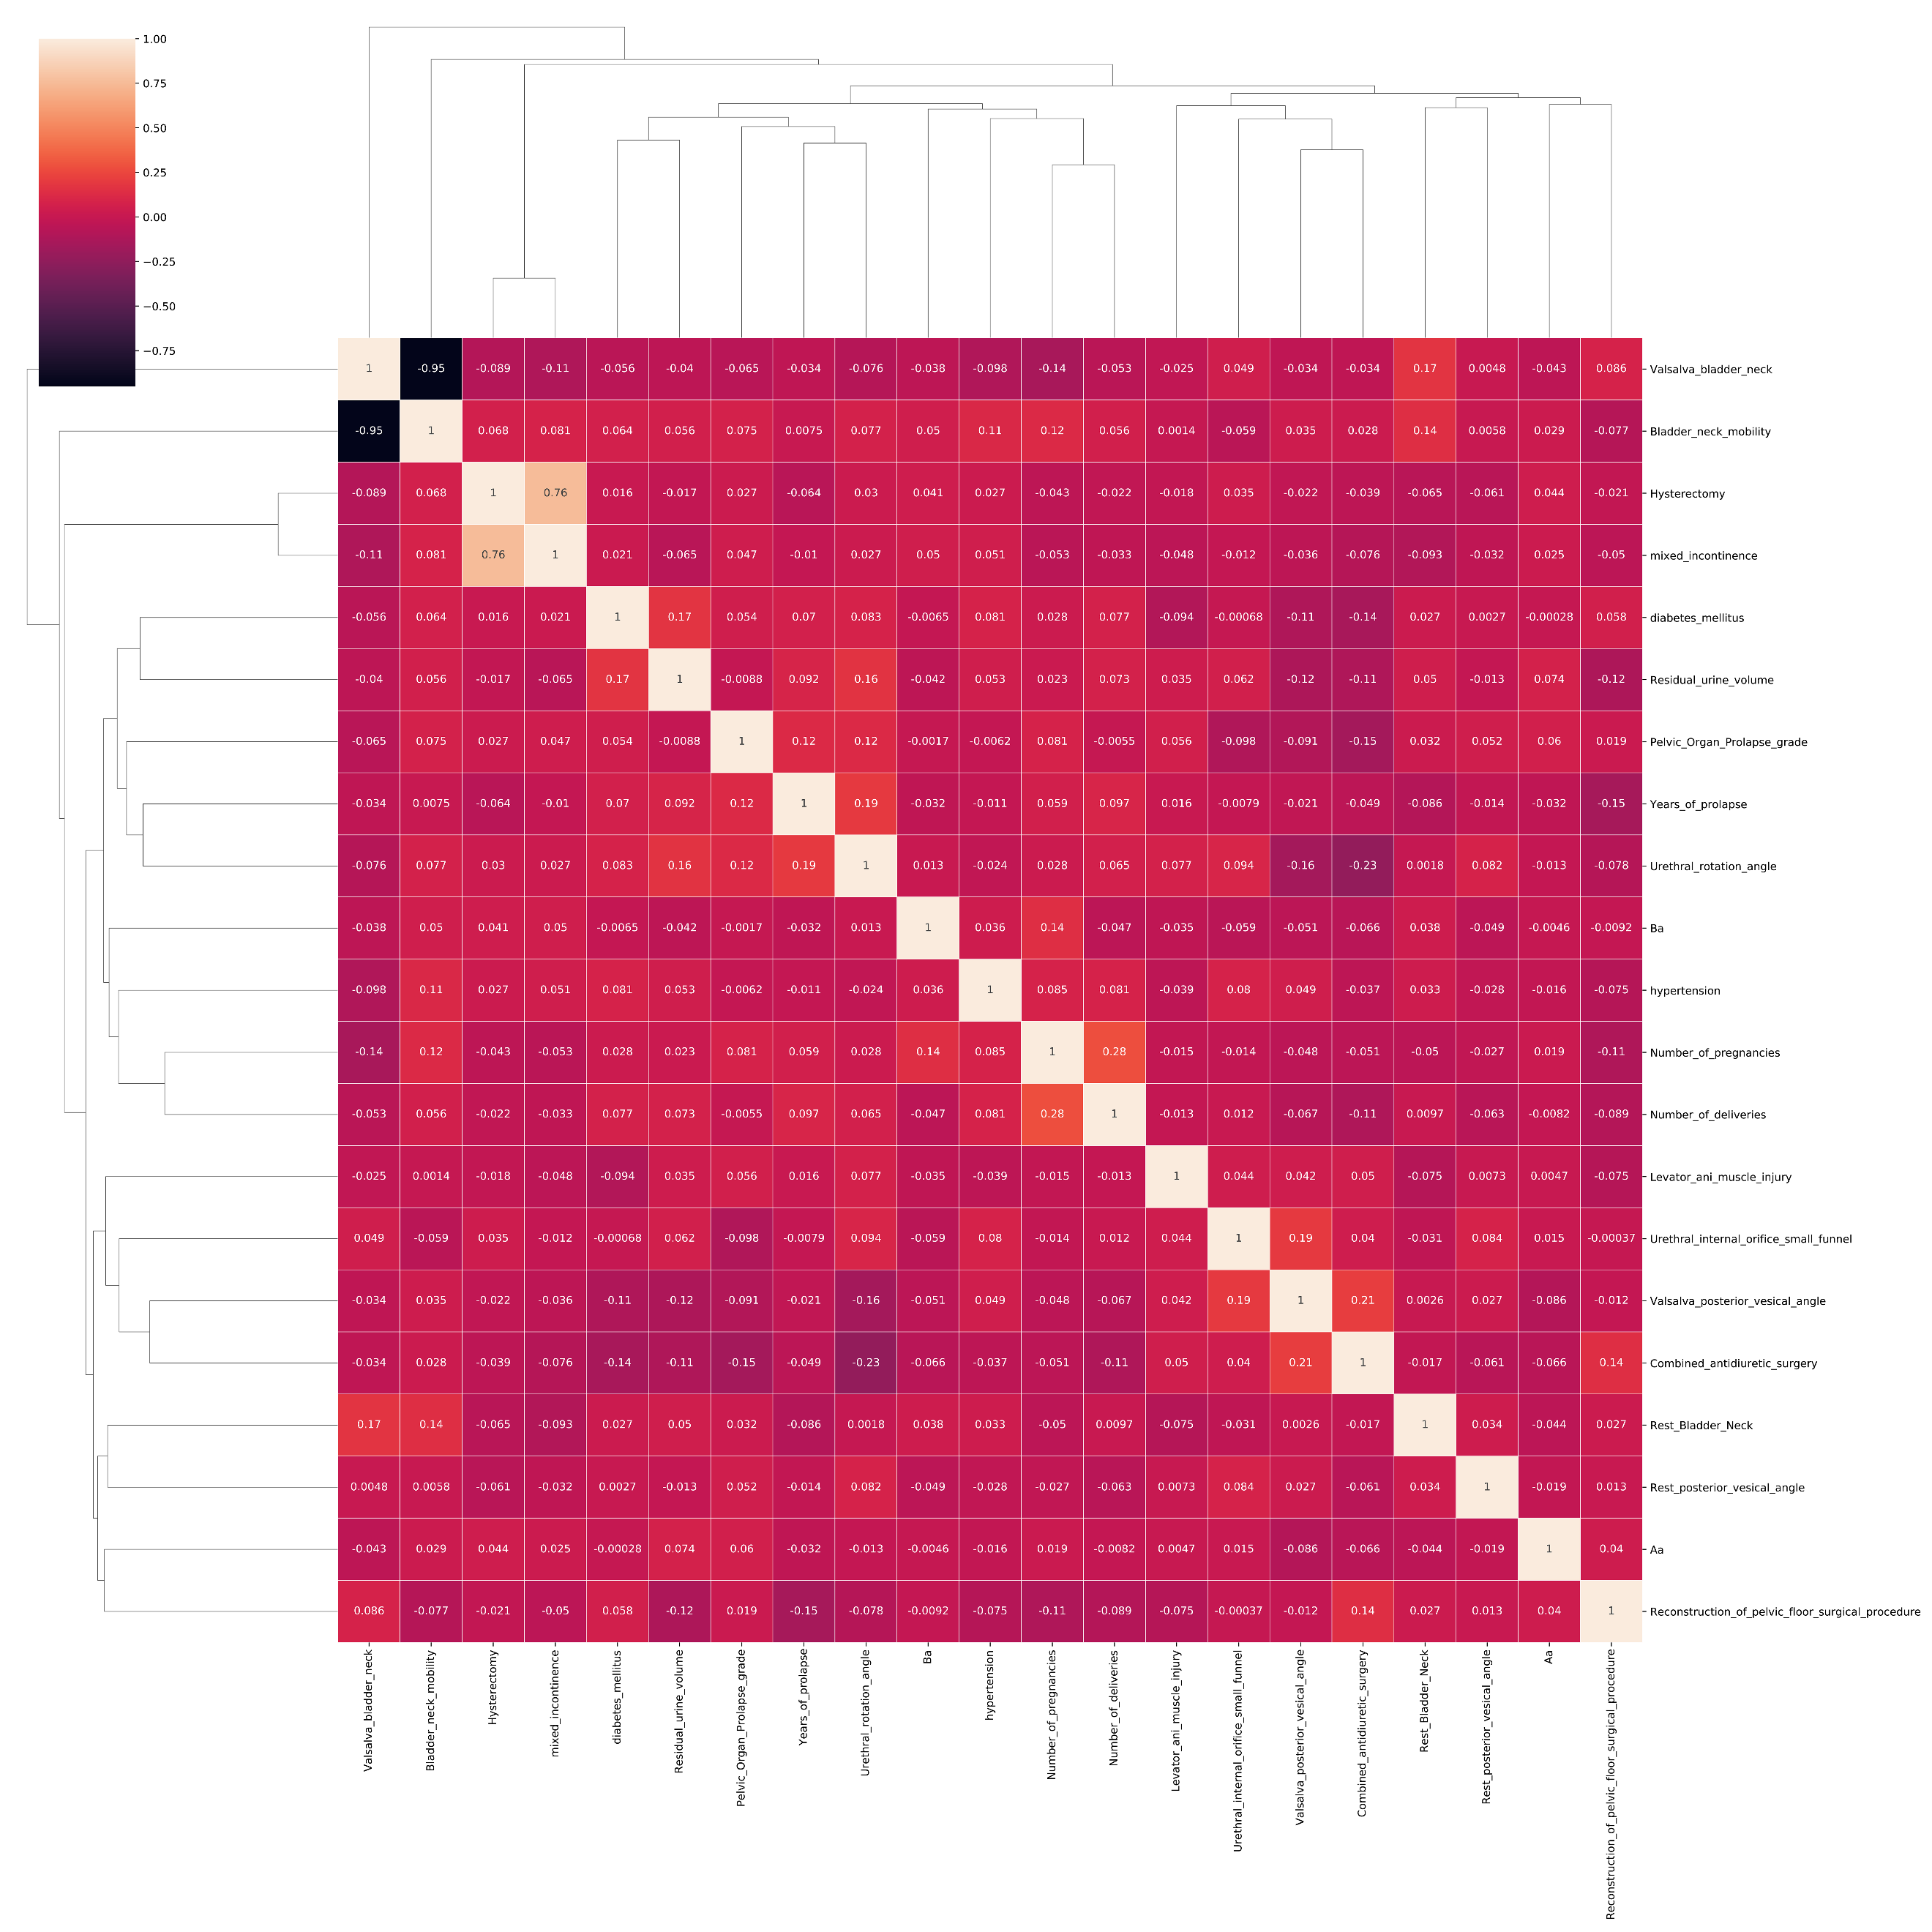
**Fig. S1.** Spearman rank correlation matrix.
